# Supplementary material
Source: PubMed Central journal article supplement (PMC1751324)
Supplement: mbc_E06-05-0426_1.pdf [file mbc_E06-05-0426_1.pdf]

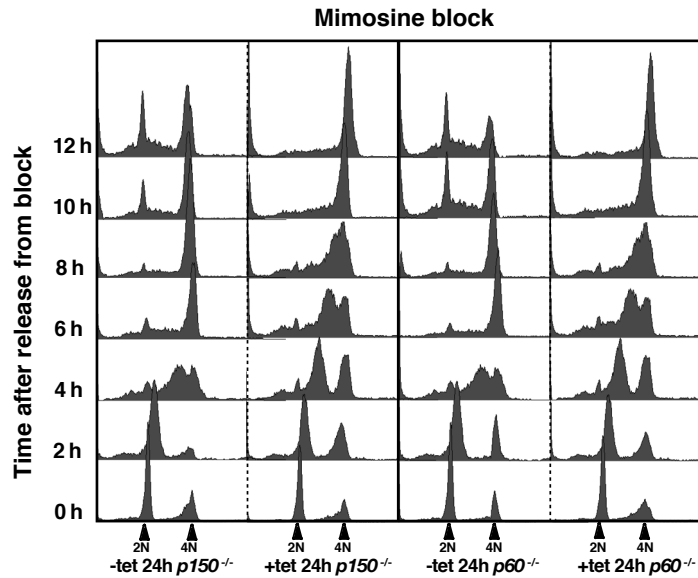

**Supplementary Figure 1.**

**Flow cytometric analysis of synchronized *p150*- and *p60*-conditional knockout cells.**

For synchronization into G<sub>1</sub>/S phase, cells were cultured in the presence or absence of tet for 16 h, followed by culture with 1 mM mimosine for 8 h. After release from the cell cycle block, cells were collected at 2 h intervals, fixed and stained with PI to detect total DNA (x axis, linear scale).
